# Supplementary material
Source: publisher site journal article supplement (https://www.dovepress.com/get_supplementary_file.php?f=162470.xlsx)
Supplement: Supplementary file 1 [file get_supplementary_file.php]

## Sheet: Sheet1
Accession Number	Description	Symbol	Coverage(%)	Match Peptides	H/L Ratio	PC-1.0/PC-1Ratio	Significance	Mascot Scores
P18669	Phosphoglycerate mutase 1	PGAM1	18.58	21	24.01	4.88751	2.70295e-06	347.01
P61604	10 kDa heat shock protein, mitochondrial	HSPE1	20.22	13	39.943	5.25275	4.58446e-07	142.37
Q92558	Wiskott-Aldrich syndrome protein family member 1	WASF1	2.33	1	19.981	4.02216	0.00011285	21.51
Q71UM5	40S ribosomal protein S27-like	RPS27L	40.48	23	5.975	3.19999	0.00212913	213.57
Q9BXY0	Protein MAK16 homolog	MAK16	19	9	16.501	3.6324	0.000488737	358.85
